# Supplementary material for: Application of Methionine Increases the Germination Rate of Maize Seeds by Triggering Multiple Phenylpropanoid Biosynthetic Genes at Transcript Levels
Source: MDPI journal article supplement (doi:10.3390/plants12223802), 2023-11-08
Supplement: s1 [file s1]

Table S1. Overview of transcriptome sequencing in maize embryos upon the water (H) and methionine (M) treatment during germination.

| Embryo | sample ID | rep  | clean reads | Q20 bases (%) | Q30 bases (%) | GC content (%) | mapping reads | mapped reads with unique loci | mapping ratio |
|--------|-----------|------|-------------|---------------|---------------|----------------|---------------|-------------------------------|---------------|
| H00    | H01       | rep1 | 59707350    | 96.29%        | 89.53%        | 56.17%         | 56987893      | 52701759                      | 95.45%        |
|        | H02       | rep2 | 51401268    | 95.91%        | 88.38%        | 54.29%         | 48944449      | 45151809                      | 95.22%        |
|        | H03       | rep3 | 50545422    | 95.90%        | 88.39%        | 55.79%         | 48157113      | 45069923                      | 95.27%        |
| H12    | H121      | rep1 | 47441258    | 96.02%        | 88.72%        | 55.41%         | 45213692      | 42697080                      | 95.30%        |
|        | H122      | rep2 | 49830018    | 96.08%        | 88.85%        | 53.39%         | 47586609      | 44691138                      | 95.50%        |
|        | H123      | rep3 | 52120110    | 96.14%        | 89.05%        | 54.88%         | 49658450      | 45883407                      | 95.28%        |
| H24    | H241      | rep1 | 67128548    | 96.45%        | 89.89%        | 53.19%         | 64250850      | 61431073                      | 95.71%        |
|        | H242      | rep2 | 51286600    | 96.44%        | 89.89%        | 53.46%         | 49094509      | 47010135                      | 95.73%        |
|        | H243      | rep3 | 52720000    | 96.18%        | 89.01%        | 53.78%         | 50502368      | 48517289                      | 95.79%        |
| H36    | H361      | rep1 | 60313026    | 97.14%        | 91.16%        | 53.75%         | 58314522      | 55428234                      | 96.69%        |
|        | H362      | rep2 | 56199630    | 96.51%        | 90.12%        | 53.34%         | 53697824      | 51246328                      | 95.55%        |
|        | H363      | rep3 | 50195768    | 96.48%        | 90.00%        | 54.45%         | 48087832      | 45358822                      | 95.80%        |
| H48    | H481      | rep1 | 50206974    | 96.26%        | 89.40%        | 55.10%         | 47970816      | 44443846                      | 95.55%        |
|        | H482      | rep2 | 53184838    | 96.17%        | 89.06%        | 54.35%         | 50855563      | 48126195                      | 95.62%        |
|        | H483      | rep3 | 40601648    | 96.10%        | 88.89%        | 54.28%         | 38835442      | 36436139                      | 95.65%        |
| H60    | H601      | rep1 | 48764330    | 96.64%        | 90.31%        | 53.75%         | 46878434      | 45055712                      | 96.13%        |
|        | H602      | rep2 | 69753182    | 96.11%        | 88.87%        | 53.72%         | 66750911      | 64426579                      | 95.70%        |
|        | H603      | rep3 | 56763060    | 96.39%        | 89.77%        | 53.98%         | 54358843      | 52486144                      | 95.76%        |
| M12    | M121      | rep1 | 52510524    | 96.30%        | 89.41%        | 55.12%         | 50177697      | 47430039                      | 95.56%        |
|        | M122      | rep2 | 52433336    | 96.28%        | 89.39%        | 54.58%         | 50151671      | 46058052                      | 95.65%        |
|        | M123      | rep3 | 44545088    | 96.33%        | 89.49%        | 53.93%         | 42657287      | 40211187                      | 95.76%        |
| M24    | M241      | rep1 | 69926650    | 98.70%        | 95.58%        | 53.86%         | 68496317      | 65036749                      | 97.95%        |
|        | M242      | rep2 | 40998154    | 96.17%        | 89.11%        | 54.45%         | 39037872      | 37190614                      | 95.22%        |
|        | M243      | rep3 | 40690522    | 96.10%        | 88.80%        | 53.51%         | 38930162      | 37396035                      | 95.67%        |
| M36    | M361      | rep1 | 59795262    | 96.55%        | 90.18%        | 53.46%         | 57293004      | 54760093                      | 95.82%        |
|        | M362      | rep2 | 61069778    | 96.47%        | 89.96%        | 53.84%         | 58436295      | 55473799                      | 95.69%        |
|        | M363      | rep3 | 43430300    | 96.22%        | 89.12%        | 53.94%         | 41593480      | 39716555                      | 95.77%        |
| M48    | M481      | rep1 | 68878314    | 96.11%        | 88.88%        | 53.58%         | 65956285      | 61149591                      | 95.76%        |
|        | M482      | rep2 | 66401512    | 96.73%        | 90.77%        | 53.44%         | 63490396      | 60119900                      | 95.62%        |
|        | M483      | rep3 | 65237010    | 96.59%        | 90.31%        | 54.31%         | 62526223      | 58254397                      | 95.84%        |
| M60    | M601      | rep1 | 46840704    | 96.41%        | 89.76%        | 53.88%         | 44812482      | 42787537                      | 95.67%        |
|        | M602      | rep2 | 55294006    | 96.22%        | 89.20%        | 53.94%         | 52906934      | 51268098                      | 95.68%        |
|        | M603      | rep3 | 40238474    | 96.12%        | 88.92%        | 55.08%         | 38447160      | 36651033                      | 95.55%        |

Notes: 00, 0 hour; 12, 12 hours; 24, 24 hours; 36, 36 hours; 48, 48 hours; 60, 60 hours.

Table S2. Overview of transcriptome sequencing in maize endosperms upon the water (H) and methionine (M) treatment during germination.

| Endosperm | sample ID | rep  | clean reads | Q20 bases (%) | Q30 bases (%) | GC content (%) | mapping reads | mapped reads with unique loci | mapping ratio |
|-----------|-----------|------|-------------|---------------|---------------|----------------|---------------|-------------------------------|---------------|
| RH00      | RH01      | rep1 | 72246318    | 98.24%        | 94.38%        | 60.51%         | 70733522      | 59910653                      | 97.91%        |
|           | RH02      | rep2 | 75734520    | 98.18%        | 94.11%        | 60.68%         | 74185757      | 69728175                      | 97.96%        |
|           | RH03      | rep3 | 73641826    | 98.21%        | 94.22%        | 59.96%         | 72109851      | 66191701                      | 97.92%        |
| RH12      | RH121     | rep1 | 69956048    | 98.09%        | 93.95%        | 61.70%         | 68513166      | 63910298                      | 97.94%        |
|           | RH122     | rep2 | 58482098    | 98.19%        | 94.10%        | 57.94%         | 57002955      | 53424741                      | 97.47%        |
|           | RH123     | rep3 | 65079790    | 98.31%        | 94.45%        | 59.02%         | 63685211      | 60755066                      | 97.86%        |
| RH24      | RH241     | rep1 | 89928532    | 98.48%        | 94.87%        | 59.70%         | 88517089      | 85570802                      | 98.43%        |
|           | RH242     | rep2 | 74820196    | 95.86%        | 90.40%        | 58.22%         | 71502450      | 69382290                      | 95.57%        |
|           | RH243     | rep3 | 85341072    | 98.54%        | 95.03%        | 59.89%         | 83873327      | 80329611                      | 98.28%        |
| RH36      | RH361     | rep1 | 78353544    | 98.54%        | 95.03%        | 59.39%         | 77083067      | 74196333                      | 98.38%        |
|           | RH362     | rep2 | 85435822    | 98.44%        | 94.71%        | 60.16%         | 84111188      | 81075014                      | 98.45%        |
|           | RH363     | rep3 | 87015072    | 98.55%        | 95.08%        | 60.09%         | 85382906      | 81605989                      | 98.12%        |
| RH48      | RH481     | rep1 | 92440744    | 98.40%        | 94.68%        | 61.46%         | 90845117      | 87561983                      | 98.27%        |
|           | RH482     | rep2 | 78520804    | 98.46%        | 94.77%        | 59.63%         | 77265023      | 74136789                      | 98.40%        |
|           | RH483     | rep3 | 76783620    | 98.53%        | 95.07%        | 60.26%         | 75577725      | 72492394                      | 98.43%        |
| RH60      | RH601     | rep1 | 70230690    | 98.49%        | 94.86%        | 59.18%         | 69198229      | 66559031                      | 98.53%        |
|           | RH602     | rep2 | 64109216    | 95.59%        | 89.98%        | 59.51%         | 60674709      | 58654623                      | 94.64%        |
|           | RH603     | rep3 | 65716316    | 95.75%        | 90.29%        | 60.13%         | 62398927      | 60705585                      | 94.95%        |
| RM12      | RM121     | rep1 | 60911658    | 98.34%        | 94.54%        | 58.46%         | 59754116      | 57255918                      | 98.10%        |
|           | RM122     | rep2 | 83292556    | 98.52%        | 94.99%        | 59.15%         | 81615121      | 76766841                      | 97.99%        |
|           | RM123     | rep3 | 88959410    | 98.46%        | 94.91%        | 60.97%         | 86990613      | 81964985                      | 97.79%        |
| RM24      | RM241     | rep1 | 83007382    | 98.44%        | 94.70%        | 59.31%         | 81651521      | 78868973                      | 98.37%        |
|           | RM242     | rep2 | 64062894    | 95.54%        | 89.71%        | 58.90%         | 61140092      | 59130586                      | 95.44%        |
|           | RM243     | rep3 | 94493398    | 98.52%        | 94.84%        | 60.14%         | 93084919      | 89879392                      | 98.51%        |
| RM36      | RM361     | rep1 | 79721590    | 98.34%        | 94.45%        | 60.95%         | 78292334      | 74821942                      | 98.21%        |
|           | RM362     | rep2 | 67783552    | 98.51%        | 94.89%        | 59.34%         | 66137271      | 63704690                      | 97.57%        |
|           | RM363     | rep3 | 94160836    | 98.35%        | 94.48%        | 59.96%         | 92576831      | 89465814                      | 98.32%        |
| RM48      | RM481     | rep1 | 65503976    | 95.58%        | 89.89%        | 60.46%         | 62295552      | 60225502                      | 95.10%        |
|           | RM482     | rep2 | 81845372    | 98.48%        | 94.91%        | 59.40%         | 80539116      | 77724488                      | 98.40%        |
|           | RM483     | rep3 | 95971342    | 98.48%        | 94.89%        | 59.84%         | 94356959      | 90421314                      | 98.32%        |
| RM60      | RM601     | rep1 | 60513970    | 95.49%        | 89.74%        | 59.07%         | 57219999      | 55204928                      | 94.56%        |
|           | RM602     | rep2 | 64483098    | 95.82%        | 90.45%        | 60.14%         | 61229818      | 59413784                      | 94.95%        |
|           | RM603     | rep3 | 66425564    | 95.59%        | 89.91%        | 58.46%         | 63060750      | 61159138                      | 94.93%        |

Notes: 00, 0 hour; 12, 12 hours; 24, 24 hours; 36, 36 hours; 48, 48 hours; 60, 60 hours.

Table S3: Annotation results using various databases.

| Database                                                                | number |
|-------------------------------------------------------------------------|--------|
| GO (Gene Ontology)                                                      | 3,441  |
| KEGG                                                                    | 691    |
| KOG (Cluster of Orthologous Groups of proteins)                         | 2,384  |
| Pfam (Protein families database of alignments and hidden Markov models) | 2,490  |
| Swiss-Prot                                                              | 2,534  |
| eggNOG (evolutionary genealogy of genes:Non-supervised Orthologous)     | 6,023  |
| Non-Redundant Protein Sequence Database                                 | 9,732  |
| All                                                                     | 9,890  |

Table S4. Protein annotations and abbreviations involved in Figure 8.

| GeneID         | Name   | Annotation                                                                                        | KEGG                                                                                                                 |
|----------------|--------|---------------------------------------------------------------------------------------------------|----------------------------------------------------------------------------------------------------------------------|
| Zm00001d011208 | ACCO5  | 1-aminocyclopropane-1-carboxylate oxidase                                                         | Cysteine and methionine metabolism                                                                                   |
| Zm00001d033862 | ACS6   | 1-aminocyclopropane-1-carboxylate synthase                                                        | Cysteine and methionine metabolism                                                                                   |
| Zm00001d026060 | ACS7   | 1-aminocyclopropane-1-carboxylate synthase                                                        | Cysteine and methionine metabolism                                                                                   |
| Zm00001d043302 | HMT4   | Homocysteine S-methyltransferase                                                                  | Cysteine and methionine metabolism                                                                                   |
| Zm00001d020544 | IDP754 | S-adenosylmethionine decarboxylase<br>proenzyme                                                   | Cysteine and methionine metabolism                                                                                   |
| Zm00001d018977 | MET1   | DNA (cytosine-5)-methyltransferase                                                                | Cysteine and methionine metabolism                                                                                   |
| Zm00001d013644 | METS2  | 5-methyltetrahydropteroyltriglutamate--<br>homocysteine methyltransferase                         | Cysteine and methionine metabolism                                                                                   |
| Zm00001d033480 | METS3  | 5-methyltetrahydropteroyltriglutamate--<br>homocysteine methyltransferase                         | Cysteine and methionine metabolism                                                                                   |
| Zm00001d009146 | SAMS2  | S-adenosylmethionine synthetase                                                                   | Cysteine and methionine metabolism                                                                                   |
| Zm00001d048736 | NAAT-A | Nicotianamine aminotransferase                                                                    | Cysteine and methionine metabolism /<br>Phenylalanine metabolism / Tyrosine<br>metabolism                            |
| Zm00001d003830 | ADT6   | Arogenate dehydratase                                                                             | Phenylalanine, tyrosine and tryptophan<br>biosynthesis                                                               |
| Zm00001d046168 | ARODH4 | Arogenate dehydrogenase                                                                           | Phenylalanine, tyrosine and tryptophan<br>biosynthesis                                                               |
| Zm00001d012674 | CMU1   | Chorismate mutase                                                                                 | Phenylalanine, tyrosine and tryptophan<br>biosynthesis                                                               |
| Zm00001d042685 | GOT4   | Glutamate-oxaloacetate transaminase                                                               | Phenylalanine, tyrosine and tryptophan<br>biosynthesis / Tyrosine metabolism /<br>Phenylalanine metabolism (ko00360) |
| Zm00001d010190 | GOT5   | Bifunctional aspartate aminotransferase and<br>glutamate/aspartate-prephenate<br>aminotransferase | Phenylalanine, tyrosine and tryptophan<br>biosynthesis / Tyrosine metabolism /<br>Phenylalanine metabolism (ko00360) |
| Zm00001d024664 | Td1    | Tyrosine decarboxylase                                                                            | Phenylalanine metabolism, Tyrosine<br>metabolism, Tryptophan metabolism                                              |
| Zm00001d051164 | PAL1   | Phenylalanine ammonia lyase                                                                       | Phenylalanine metabolism /<br>Phenylpropanoid biosynthesis                                                           |
| Zm00001d003016 | PAL2   | Phenylalanine ammonia lyase                                                                       | Phenylalanine metabolism /<br>Phenylpropanoid biosynthesis                                                           |
| Zm00001d051161 | PAL3   | Phenylalanine ammonia lyase                                                                       | Phenylalanine metabolism /<br>Phenylpropanoid biosynthesis                                                           |
| Zm00001d051163 | PAL5   | Phenylalanine ammonia lyase                                                                       | Phenylalanine metabolism /                                                                                           |

|                |           |                                     |                                                                                            |
|----------------|-----------|-------------------------------------|--------------------------------------------------------------------------------------------|
| Zm00001d003015 | PAL6      | Phenylalanine ammonia lyase         | Phenylpropanoid biosynthesis<br>Phenylalanine metabolism /<br>Phenylpropanoid biosynthesis |
| Zm00001d017279 | PAL7      | Phenylalanine ammonia lyase         | Phenylalanine metabolism /<br>Phenylpropanoid biosynthesis                                 |
| Zm00001d017275 | PAL9      | Phenylalanine ammonia lyase         | Phenylalanine metabolism /<br>Phenylpropanoid biosynthesis                                 |
| Zm00001d049541 | BM3       | Caffeic acid 3-O-methyltransferase  | Phenylpropanoid biosynthesis/Tryptophan<br>metabolism                                      |
| Zm00001d015459 | BM5       | 4-coumarate--CoA ligase             | Phenylpropanoid biosynthesis                                                               |
| Zm00001d024314 | CAD       | Cinnamyl alcohol dehydrogenase      | Phenylpropanoid biosynthesis                                                               |
| Zm00001d032152 | CNCR1     | Cinnamoyl CoA reductase             | Phenylpropanoid biosynthesis                                                               |
| Zm00001d037849 | CYP73A122 | Trans-cinnamate 4-monooxygenase     | Phenylpropanoid biosynthesis                                                               |
| Zm00001d016471 | CYP73A8   | Trans-cinnamate 4-monooxygenase     | Phenylpropanoid biosynthesis                                                               |
| Zm00001d013862 | CYP84A34  | Trans-cinnamate 4-monooxygenase     | Phenylpropanoid biosynthesis                                                               |
| Zm00001d038555 | CYP98A29  | cytochrome P450 superfamily protein | Phenylpropanoid biosynthesis                                                               |
| Zm00001d003129 | HCT5      | Hydroxycinnamoyltransferase         | Phenylpropanoid biosynthesis                                                               |
| Zm00001d040705 | Px19      | Peroxidase                          | Phenylpropanoid biosynthesis                                                               |
| Zm00001d038598 | Px2       | Peroxidase                          | Phenylpropanoid biosynthesis                                                               |
| Zm00001d032405 | Px20      | Peroxidase                          | Phenylpropanoid biosynthesis                                                               |
| Zm00001d022457 | Px3       | Peroxidase                          | Phenylpropanoid biosynthesis                                                               |
| Zm00001d037550 | Px5       | Peroxidase                          | Phenylpropanoid biosynthesis                                                               |
| Zm00001d009138 | Px64      | Peroxidase                          | Phenylpropanoid biosynthesis                                                               |
| Zm00001d037410 | Px69      | Peroxidase                          | Phenylpropanoid biosynthesis                                                               |
| Zm00001d029604 | Px70      | Peroxidase                          | Phenylpropanoid biosynthesis                                                               |

Table S5. Primer sequences in this study.

| Name      | Gene ID         | Sequence (5'-3')               |
|-----------|-----------------|--------------------------------|
| ZmGAPDH-F | Zm00001eb080840 | CCCTTCATCACCACGGACTAC          |
| ZmGAPDH-R |                 | AACCTTCTTGGCACCACCCT           |
| METS2-F   | Zm00001d013644  | TAAGATTTTACTGTTATATAGAAAGATGGC |
| METS2-R   |                 | GGGACAATAAAGTGGTAGTTTGTATC     |
| MTHFR1-F  | Zm00001d034602  | CACCGAACGCCGTGAATGCT           |
| MTHFR1-R  |                 | ACGAGGCTGACCAGGTAGTAGG         |
| ACCO5-F   | Zm00001d011208  | GGACGAAGTTTCGTTGCTGCT          |
| ACCO5-R   |                 | TTGTGTTGTTGCTGCTGCAT           |
| CCP17-F   |                 | TCAGACGCCGACGACAACCA           |
| CCP17-R   |                 | GCTGCTCCGATAACGACACCAA         |
